# Supplementary material for: Investigation on type-II Cu2S–CdS core/shell nanocrystals: synthesis and characterization
Source: Royal Society of Chemistry journal article supplement (doi:10.1039/b917837f), 2009-12-10
Supplement: b917837f.pdf [file b917837f.pdf]

## Supplementary Information

### Investigation on Type-II Cu<sub>2</sub>S-CdS Core/Shell Nanocrystals: Synthesis and Characterization

Xiaomin Li, Huaibin Shen, Sen Li, Jinzhong Niu, Hongzhe Wang, Lin Song Li\*

Key Laboratory for Special Functional Materials of Ministry of Education, Henan University, Kaifeng 475004, P. R. China

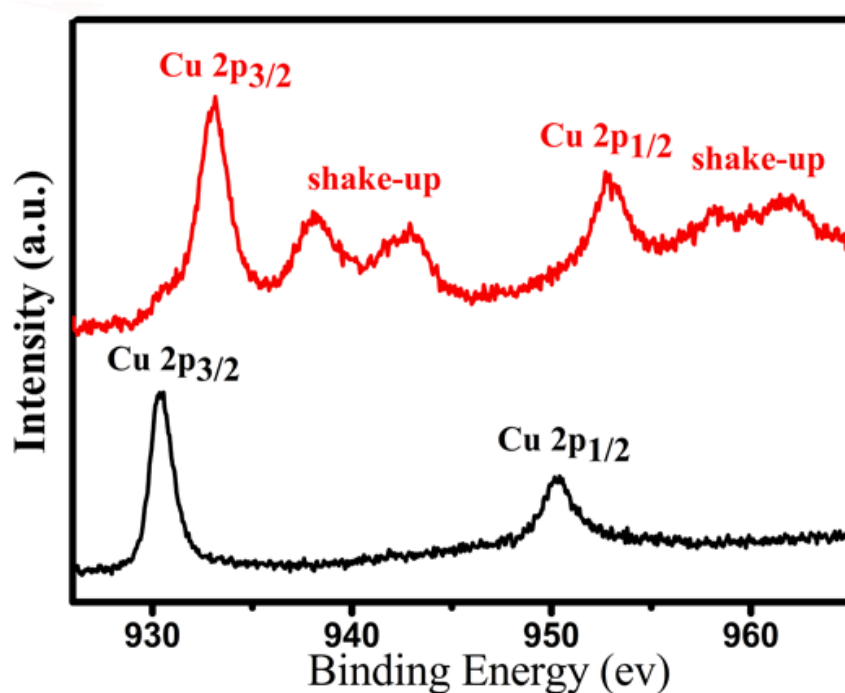

**Figure S1.** Cu core level X-ray photoelectron spectrum of as-prepared CuSt<sub>2</sub> (red) and Cu<sub>2</sub>S (black).
